# Supplementary material for: Molecular analysis of oral microflora in patients with primary Sjögren’s syndrome by using high-throughput sequencing
Source: PeerJ journal article supplement (doi:10.7717/peerj.5649), 2018-09-28

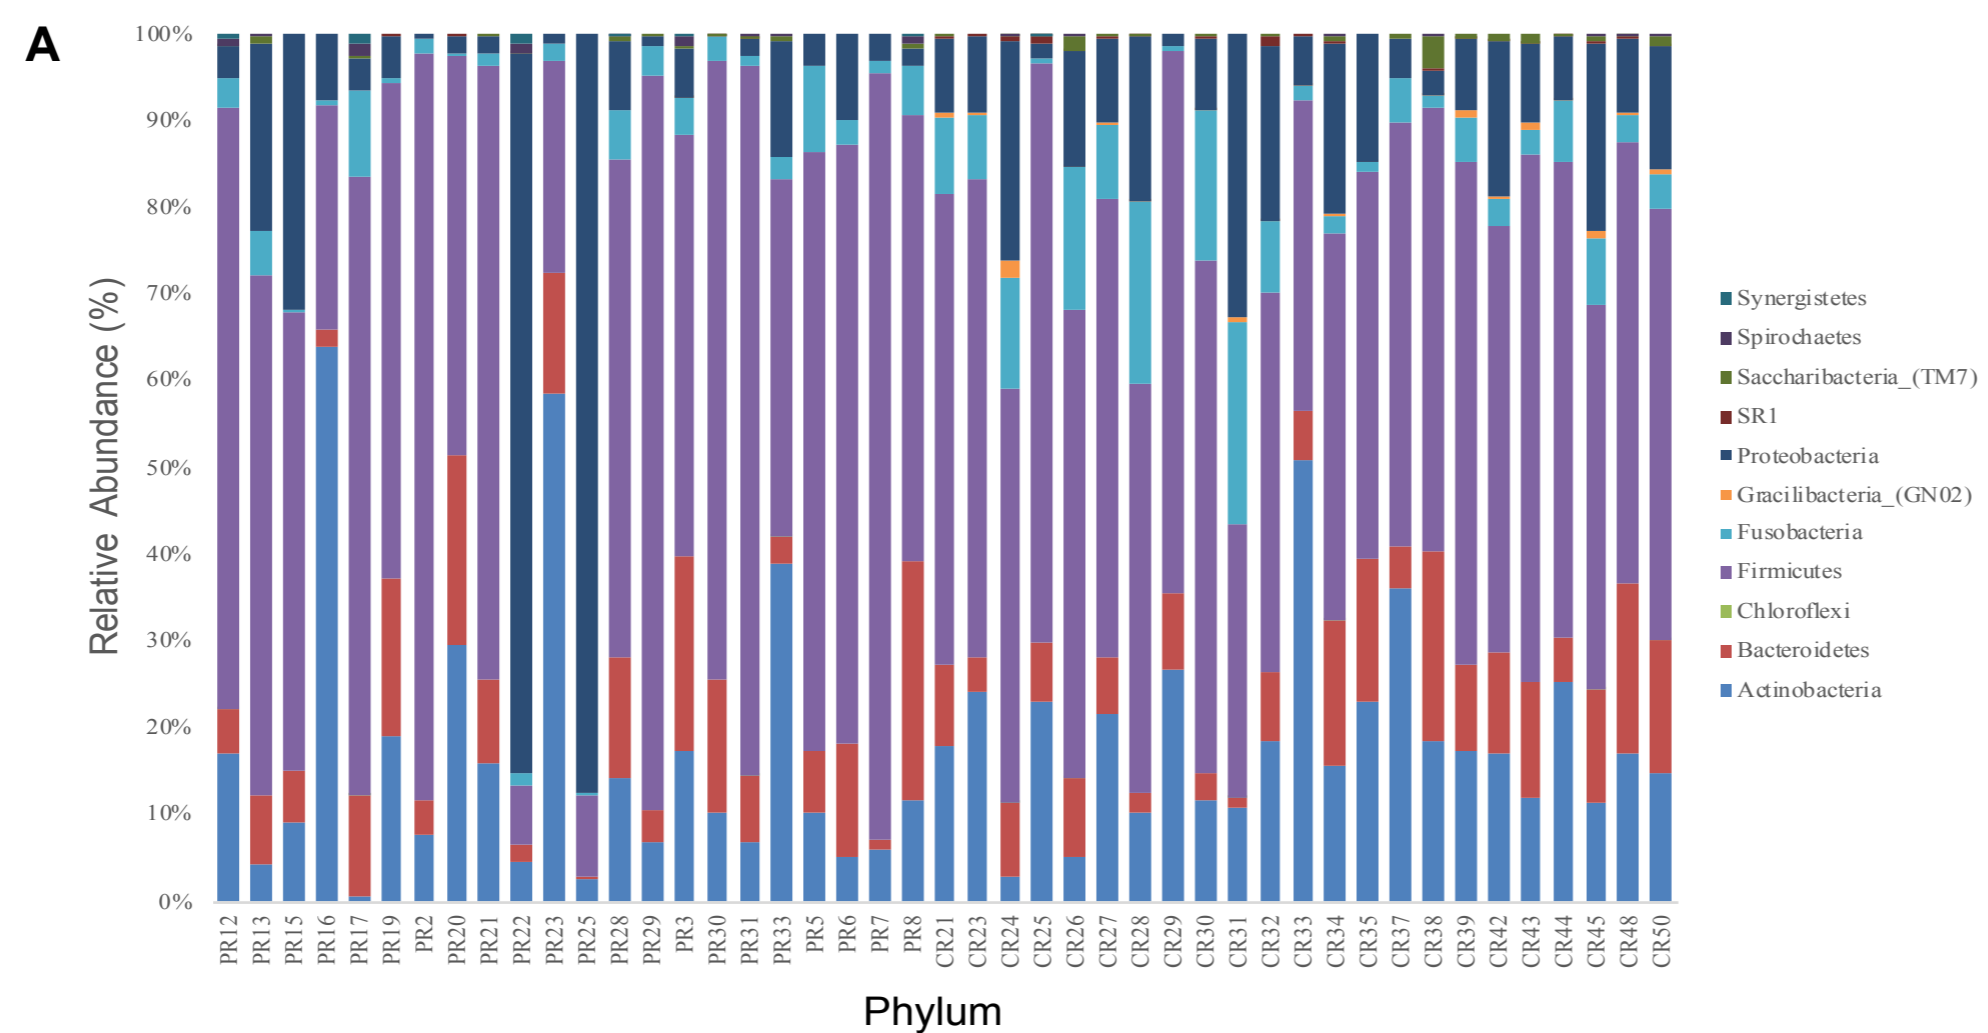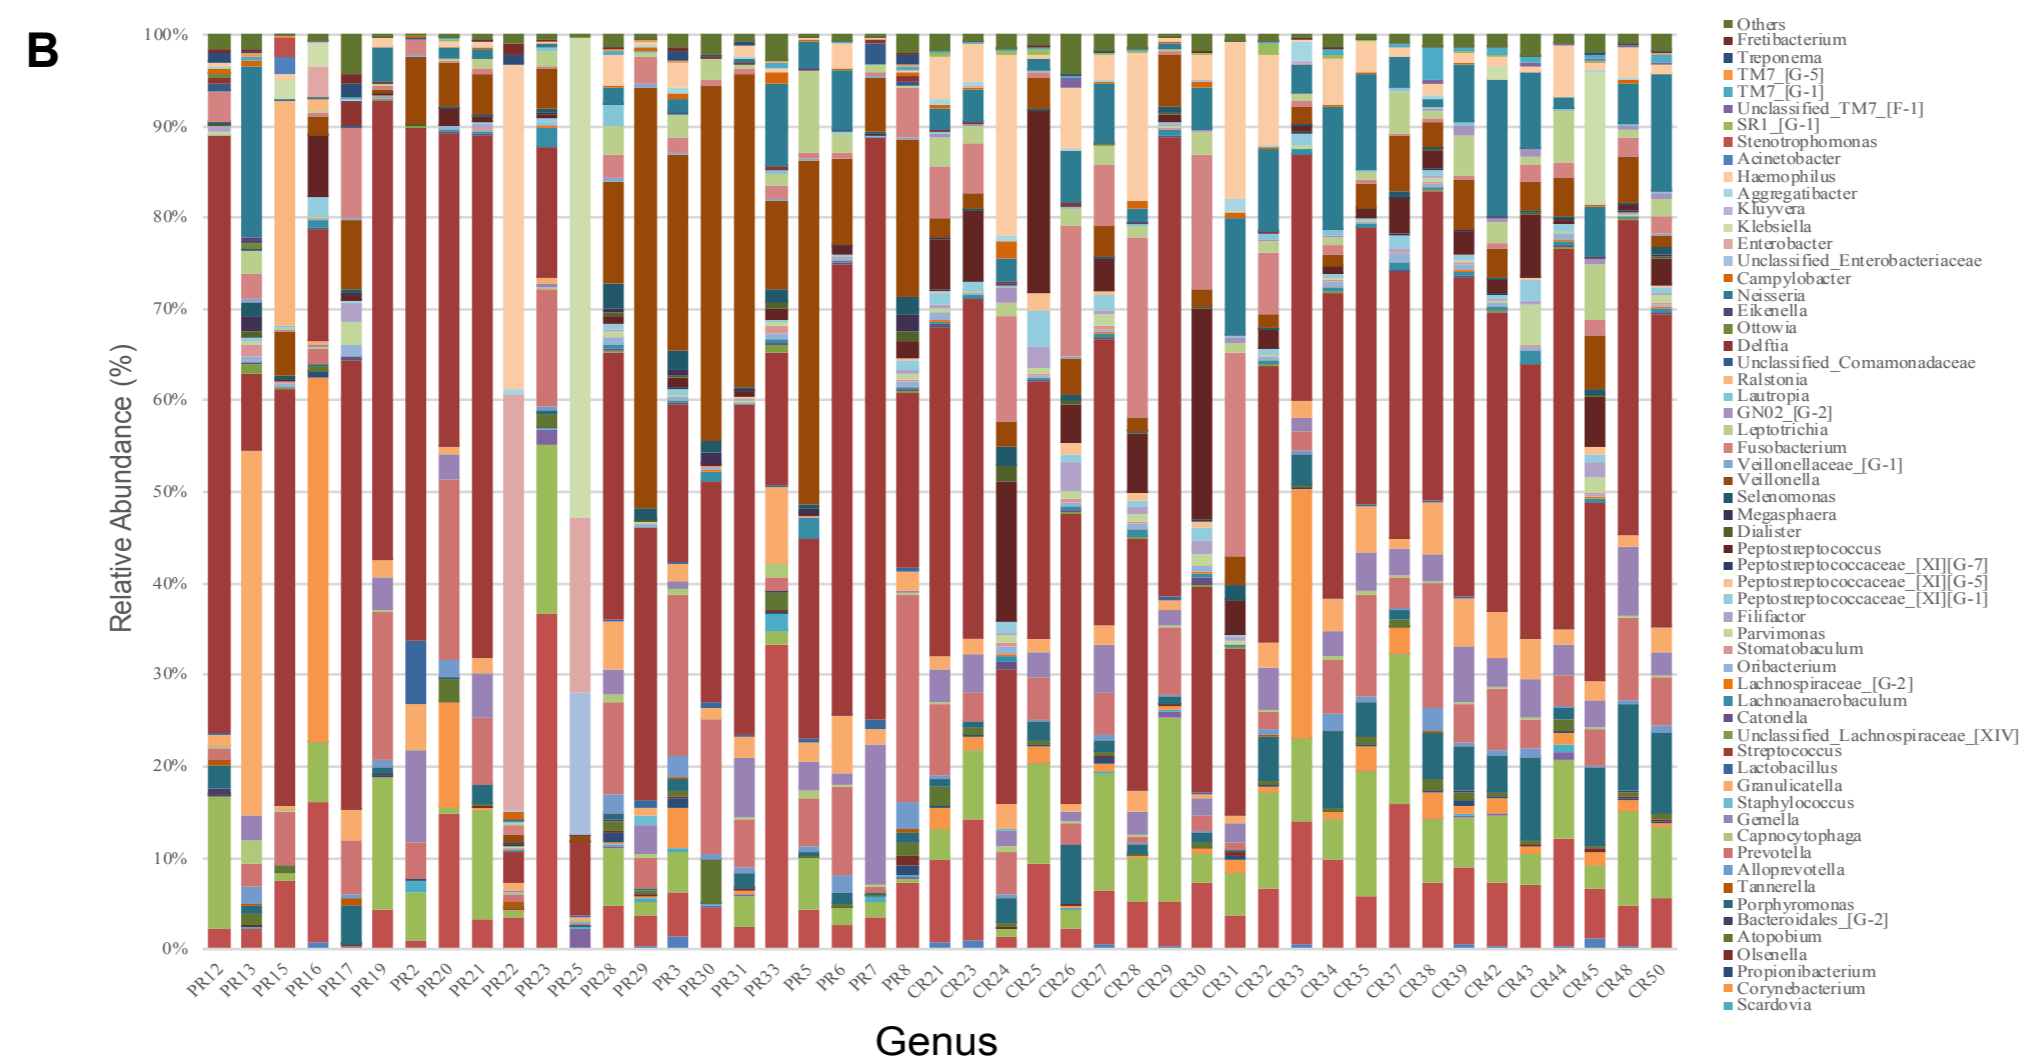

Supplement: FigureS1.pdf [file FigureS1.pdf]
