# Supplementary material for: Molecular analysis of oral microflora in patients with primary Sjögren’s syndrome by using high-throughput sequencing
Source: PeerJ. 2018 Sep 28;6:e5649. doi: 10.7717/peerj.5649 (PMC6166617; doi:10.7717/peerj.5649)
Supplement: Supplemental Information 1 [file peerj-06-5649-s003.xlsx]

## Sheet: Sheet1
Group	ID	SEX	AGE	decayed	missed	filled	DMFT	DMFS	C18_D	C18_B	C18_L	C18_O	C17_M	C17_D	C17_B	C17_L	C17_O	C16_M	C16_D	C16_B	C16_L	C16_O	C15_M	C15_D	C15_B	C15_L	C15_O	C14_M	C14_D	C14_B	C14_L	C14_O	C13_M	C13_D	C13_B	C13_L	C12_M	C12_D	C12_B	C12_L	C11_M	C11_D	C11_B	C11_L	C21_M	C21_D	C21_B	C21_L	C22_M
0	002	2	58	12	18	2	32	133	4	4	4	4	4	4	4	4	4	4	4	4	4	4	4	4	4	4	4	4	4	4	4	4	4	4	4	4	4	4	4	4	4	4	4	4	4	4	4	4	1
0	003	2	66	4	7	12	23	76	4	4	4	4	3	0	0	0	3	4	4	4	4	4	0	0	0	0	0	3	3	3	3	3	0	1	0	0	0	0	0	0	0	0	2	0	3	3	3	3	0
0	005	2	58	14	4	2	20	52	4	4	4	4	0	0	1	0	0	0	0	0	3	3	0	3	0	0	3	0	1	0	0	1	0	0	0	0	0	0	0	0	1	0	0	1	1	0	0	1	0
0	006	2	73	25	1	6	32	85	1	1	0	1	0	0	0	3	0	1	0	3	3	3	1	0	2	0	3	0	0	3	0	0	0	0	3	0	1	0	0	1	1	1	1	1	1	1	1	1	1
0	007	2	59	13	9	1	23	74	4	4	4	4	1	0	0	0	1	3	1	0	0	2	0	0	0	0	0	0	1	0	0	1	0	0	0	0	0	0	0	0	1	0	0	0	0	0	0	0	1
0	008	2	53	19	4	8	31	100	4	4	4	4	3	0	0	0	2	3	3	3	3	3	0	3	3	0	2	1	1	3	1	1	1	1	0	1	1	1	0	0	3	1	0	3	3	1	0	1	1
0	012	2	66	9	15	5	29	99	4	4	4	4	4	4	4	4	4	4	4	4	4	4	4	4	4	4	4	2	0	2	2	0	1	1	0	1	0	1	0	0	3	0	0	3	2	0	0	2	0
0	013	2	57	21	10	0	31	134	4	4	4	4	4	4	4	4	4	1	1	1	1	1	1	1	1	1	1	1	1	1	1	1	1	0	0	0	1	1	1	1	1	1	0	1	1	1	1	1	1
0	015	2	66	3	7	4	14	50	4	4	4	4	4	4	4	4	4	0	0	0	0	0	0	0	0	0	0	0	0	0	0	0	0	0	0	0	0	0	0	0	0	0	0	0	0	0	0	0	0
0	016	2	44	17	3	4	24	70	4	4	4	4	0	0	0	0	0	1	0	0	0	0	1	1	0	0	1	0	1	0	0	1	0	0	0	0	2	0	0	2	3	3	3	3	3	3	3	3	1
0	017	2	69	4	5	6	15	48	4	4	4	4	0	0	0	0	0	3	3	3	3	3	0	0	0	0	0	0	0	0	0	0	0	0	0	0	0	0	2	0	0	0	3	0	0	0	0	0	0
0	019	2	70	3	19	7	29	103	4	4	4	4	4	4	4	4	4	0	0	0	3	3	0	0	0	0	0	3	0	3	3	3	4	4	4	4	0	0	3	0	0	0	2	0	0	0	3	0	4
0	020	2	67	13	4	5	22	58	4	4	4	4	1	0	0	0	1	1	1	0	0	1	1	1	2	0	1	1	1	0	0	1	0	1	3	0	1	0	0	0	1	0	0	1	1	0	0	1	0
0	021	2	65	0	4	5	9	26	4	4	4	4	4	4	4	4	4	0	0	0	0	0	0	0	0	0	0	0	0	0	0	0	7	7	7	7	7	7	7	7	4	4	4	4	4	4	4	4	7
0	022	2	59	1	10	7	18	59	4	4	4	4	0	0	0	0	0	4	4	4	4	4	4	4	4	4	4	0	0	3	0	3	0	0	3	3	0	0	0	0	0	0	0	3	0	0	0	0	0
0	023	2	55	5	6	8	19	50	4	4	4	4	0	0	0	0	0	0	0	0	0	0	1	0	0	0	1	0	1	0	0	1	0	0	0	0	0	0	0	0	1	1	0	0	3	3	3	3	4
0	025	2	59	26	3	0	29	120	1	1	1	1	1	1	1	1	1	1	1	1	1	1	1	1	1	1	1	1	1	1	1	1	0	0	0	0	1	1	1	1	1	1	0	1	1	0	0	1	0
0	028	2	54	12	3	9	24	60	0	1	1	1	0	0	0	0	0	3	3	3	3	3	3	3	3	3	3	0	0	3	0	0	1	0	0	0	1	0	0	1	0	0	0	0	3	3	3	3	3
0	029	2	75	5	7	4	16	51	4	4	4	4	4	4	4	4	4	4	4	4	4	4	1	0	3	0	0	1	1	0	0	0	0	1	0	0	0	0	0	0	0	0	0	0	0	0	0	0	0
0	030	2	58	20	2	5	27	61	0	1	1	0	0	0	0	0	1	1	1	0	0	0	1	1	1	1	1	0	0	3	0	1	0	0	0	1	1	2	0	0	1	1	3	1	1	1	3	0	1
0	031	2	55	9	15	0	24	98	4	4	4	4	4	4	4	4	4	0	0	0	1	0	4	4	4	4	4	0	0	0	0	0	0	0	0	0	0	0	0	0	0	0	0	0	1	0	0	1	0
0	033	2	67	2	5	7	14	35	4	4	4	4	3	0	0	0	3	0	0	3	0	0	0	0	0	0	0	0	0	3	0	0	0	0	0	0	0	0	0	0	0	0	0	0	0	0	0	0	0
1	121	2	69	1	10	4	15	60	4	4	4	4	4	4	4	4	4	0	0	0	0	3	0	0	0	0	0	4	4	4	4	4	0	0	3	0	0	0	0	0	0	0	0	0	0	0	0	0	0
1	123	2	56	9	4	3	16	52	4	4	4	4	0	0	0	0	0	3	0	0	0	3	4	4	4	4	4	0	0	0	0	0	0	0	1	0	1	1	1	1	0	0	0	0	0	0	0	0	1
1	124	2	58	1	3	1	5	22	0	0	0	0	0	0	0	0	0	3	3	3	3	3	0	0	0	0	0	0	0	0	0	0	0	0	0	0	0	0	0	0	0	0	0	0	0	0	0	0	0
1	125	2	53	0	2	2	4	12	4	4	4	4	0	0	0	0	0	0	0	0	0	0	0	0	0	0	0	0	0	0	0	0	0	0	0	0	0	0	0	0	0	0	0	0	0	0	0	0	0
1	126	2	55	2	1	0	3	8	0	0	0	0	0	0	0	0	0	0	0	0	0	0	0	0	0	0	0	0	0	0	0	0	0	0	0	0	0	0	0	0	0	0	0	0	0	0	0	0	0
1	127	2	70	19	1	0	20	46	0	0	0	1	0	0	0	0	0	0	0	1	0	0	0	0	0	0	0	0	0	0	0	0	0	0	0	0	1	0	0	0	0	1	1	0	0	0	1	0	0
1	128	2	52	1	5	2	8	28	4	4	4	4	0	0	0	0	0	0	0	0	0	0	0	0	0	0	0	0	1	0	0	0	0	0	0	0	0	0	0	0	0	0	0	0	0	0	0	0	0
1	129	2	62	4	0	2	6	13	0	0	0	0	0	0	0	0	0	0	0	0	0	0	0	3	0	0	3	0	0	0	0	0	0	0	0	0	0	0	0	0	0	0	0	0	0	1	0	0	0
1	130	2	54	3	5	1	9	34	4	4	4	4	0	0	0	0	1	1	0	0	0	0	0	0	0	0	0	0	0	0	0	0	0	0	0	0	0	0	0	0	0	0	0	0	0	0	0	0	0
1	131	2	55	3	4	4	11	36	4	4	4	4	0	0	0	0	0	0	0	0	0	0	3	3	3	3	3	0	1	0	0	0	0	0	0	0	0	0	0	0	0	0	0	0	0	0	0	0	0
1	132	2	55	2	4	7	13	38	4	4	4	4	0	0	0	0	3	1	0	0	0	0	1	0	0	0	0	0	0	0	0	3	0	0	0	0	0	0	0	0	0	0	0	0	0	0	0	0	0
1	133	2	64	2	3	0	5	22	0	0	0	0	0	0	0	0	0	0	0	0	0	0	0	0	0	0	0	0	0	0	0	0	0	0	0	0	0	0	0	0	0	0	0	0	0	0	0	0	0
1	134	2	52	0	0	4	4	4	0	0	0	3	0	0	0	0	3	0	0	0	0	0	0	0	0	0	0	0	0	0	0	0	0	0	0	0	0	0	0	0	0	0	0	0	0	0	0	0	0
1	135	2	57	0	1	7	8	15	0	0	0	0	0	0	0	0	3	0	0	0	0	0	0	0	0	0	0	0	0	0	0	0	0	0	0	0	0	0	0	0	0	0	0	0	0	0	0	0	0
1	137	2	62	1	4	1	6	27	4	4	4	4	0	0	0	0	0	0	0	0	0	0	0	0	0	0	0	0	0	0	0	0	0	0	0	0	0	0	0	0	0	0	0	0	0	0	0	0	0
1	138	2	54	0	2	11	13	53	0	0	0	0	0	0	0	0	0	0	0	0	0	0	0	0	0	0	0	3	3	3	3	3	3	3	3	3	3	3	3	3	3	3	3	3	3	3	3	3	3
1	139	2	55	2	4	4	10	29	1	1	1	1	0	0	0	0	0	0	0	0	0	3	0	0	0	0	0	0	0	0	0	0	0	0	0	0	0	0	0	0	0	0	0	0	0	0	0	0	0
1	142	2	63	1	4	3	8	25	4	4	4	4	0	0	0	0	0	0	0	0	0	0	0	0	0	0	0	0	0	0	0	0	0	0	0	0	0	0	0	0	0	0	3	0	0	0	3	0	0
1	143	2	61	0	0	0	0	0	0	0	0	0	0	0	0	0	0	0	0	0	0	0	0	0	0	0	0	0	0	0	0	0	0	0	0	0	0	0	0	0	0	0	0	0	0	0	0	0	0
1	144	2	55	0	4	3	7	30	0	0	0	0	0	0	0	0	0	3	3	3	3	3	0	0	0	0	0	0	0	0	0	0	0	0	0	0	0	0	0	0	0	0	0	0	0	0	0	0	0
1	145	2	48	1	6	3	10	44	0	0	0	0	0	0	0	0	0	0	0	0	0	0	0	0	0	0	0	4	4	4	4	4	0	0	0	0	0	0	0	0	0	0	0	0	0	0	0	0	0
1	148	2	61	0	2	0	2	9	0	0	0	0	0	0	0	0	0	0	0	0	0	0	0	0	0	0	0	0	0	0	0	0	0	0	0	0	0	0	0	0	0	0	0	0	0	0	0	0	0
1	150	2	63	2	8	8	18	61	4	4	4	4	4	4	4	4	4	4	4	4	4	4	4	4	4	4	4	3	1	0	0	0	0	3	3	3	0	0	0	0	0	0	0	0	0	0	0	0	0
[truncated: 173 more columns]
